# 1 **DoubletFinder: Doublet detection in single-cell RNA sequencing data using artificial** 2 **nearest neighbors**

3 Christopher S. McGinnis<sup>1</sup>, Lyndsay M. Murrow<sup>1</sup> and Zev J. Gartner<sup>1,2,3,4\*</sup>

4 <sup>1</sup>Department of Pharmaceutical Chemistry, University of California, San Francisco

5 <sup>2</sup>Chan Zuckerberg Biohub, University of California, San Francisco

6 <sup>3</sup>Center for Cellular Construction, University of California, San Francisco, San Francisco, CA 94158, USA

7 <sup>4</sup>Lead Contact

8 \*Correspondence: [zev.gartner@ucsf.edu](mailto:zev.gartner@ucsf.edu)

## 9 10 **SUMMARY**

11 Single-cell RNA sequencing (scRNA-seq) using droplet microfluidics occasionally  
12 produces transcriptome data representing more than one cell. These technical artifacts are  
13 caused by cell doublets formed during cell capture and occur at a frequency proportional to the  
14 total number of sequenced cells. The presence of doublets can lead to spurious biological  
15 conclusions, which justifies the practice of sequencing fewer cells to limit doublet formation rates.  
16 Here, we present a computational doublet detection tool – DoubletFinder – that identifies  
17 doublets based solely on gene expression features. DoubletFinder infers the putative gene  
18 expression profile of real doublets by generating artificial doublets from existing scRNA-seq data.  
19 Neighborhood detection in gene expression space then identifies sequenced cells with  
20 increased probability of being doublets based on their proximity to artificial doublets.  
21 DoubletFinder robustly identifies doublets across scRNA-seq datasets with variable numbers of  
22 cells and sequencing depth, and predicts false-negative and false-positive doublets defined  
23 using conventional barcoding approaches. We anticipate that DoubletFinder will aid in scRNA-  
24 seq data analysis and will increase the throughput and accuracy of scRNA-seq experiments.

## 25 26 **INTRODUCTION**

27 Since its introduction nearly a decade ago, scRNA-seq has been used to elucidate  
28 previously unknown cell types and reconstruct developmental dynamics among heterogeneous  
29 cell populations (Human Cell Atlas Consortium, 2017). At first, scRNA-seq workflows were

30 limited to tens to hundreds of cells which hindered data interpretation due to batch effects and  
31 low statistical power (Stegle et al., 2016). Today, sequencing thousands to hundreds of  
32 thousands of cells is routine due to the advent of droplet microfluidics and nanowell-based  
33 sequencing strategies (Macosko et al., 2015; Klein et al., 2015; Zheng et al., 2017; Gierahn et  
34 al., 2017; Takara Bio USA, 2018). These techniques rely on a Poisson loading strategy to  
35 compartmentalize individual cells and mRNA capture beads before cell lysis, mRNA capture,  
36 and transcript barcoding via reverse transcription. Since cells are captured randomly, the  
37 proportion of droplets containing >1 cell – known as doublets – scales linearly across an  
38 experimentally-relevant range of input cell concentrations (10X Genomics, 2017), justifying the  
39 practice of limiting the number of sequenced cells to minimize doublet formation rates.

40 The confounding effects of doublets in scRNA-seq data are well-appreciated (Ilicic et al.,  
41 2016). However, genomic and cellular barcoding techniques for identifying doublets have only  
42 recently been developed (Stoeckius et al., 2017; Kang et al., 2018; Gehring et al., 2018; Guo et  
43 al., 2018; Rosenberg et al., 2018). In one such strategy, distinct samples receive unique  
44 oligonucleotide barcodes delivered by conjugation to antibodies targeting broadly expressed  
45 cell-surface antigens. When the barcoded pools are combined and sequenced, doublets can be  
46 identified according to the co-occurrence of orthogonal cell ‘hashtags’ (Stoeckius et al., 2017).  
47 In a second strategy, doublets in a pooled population of cells from different individuals are  
48 identified by a computational pipeline, Demuxlet, which facilitates doublet inference based on  
49 the co-occurrence of mutually-exclusive SNP profiles (Kang et al., 2018).

50 By detecting doublets, both Demuxlet and Cell Hashing minimize technical artifacts while  
51 enabling users to “superload” droplet microfluidics devices for increased scRNA-seq throughput.  
52 However, both methods have limitations. First, neither method can identify doublets formed from  
53 identically-barcoded cells. Second, neither method is universally applicable across experimental

54 systems, since Demuxlet requires genetically distinct samples and Cell Hashing requires unique  
55 antibody-oligonucleotide conjugate panels for the cell types and species of interest. Third,  
56 neither method can be used to analyze existing scRNA-seq datasets. For these reasons,  
57 computational methods for defining doublets based on gene expression patterns alone are  
58 highly desirable.

59 Here, we present DoubletFinder, a computational doublet detection tool that relies solely  
60 on gene expression data. Beginning with the observation that doublets cluster separately from  
61 singlets in high-dimensional gene expression space (Stoeckius et al., 2017; Kang et al., 2018),  
62 we reasoned that real doublets would cluster together with synthetic doublets formed by  
63 averaging the expression data of two real cells. By merging artificial doublets with existing  
64 scRNA-seq data, we can distinguish doublets from singlets according to the proportion of  
65 artificial nearest neighbors (pANN) for each real cell in gene expression space. Thresholding the  
66 resulting pANN distribution to match the expected number of doublets provides an accurate  
67 metric for doublet prediction that can be applied to any scRNA-seq dataset.

68

## 69 **RESULTS**

70 DoubletFinder predicts doublets more accurately than nUMIs: Existing strategies for identifying  
71 doublets using gene expression features primarily rely on two sources of information. First, since  
72 the total number of captured mRNA molecules is expected to be greater for doublets than  
73 singlets, doublets are commonly excluded by thresholding cells with high numbers of unique  
74 molecular identifiers (nUMIs; Islam et al., 2014; Ziegenhain et al., 2017). While intuitively  
75 appealing, technical variability in mRNA capture efficiency and biological variability in mRNA  
76 content limits the utility of nUMI-based doublet predictions (Stoeckius et al., 2017). In a second  
77 strategy, doublets are removed from scRNA-seq data by identifying groups of cells exhibiting

78 the co-expression of genes with non-overlapping expression patterns *in vivo* (Rosenberg et al.,  
79 2018). This strategy cannot be applied to biological systems where such marker genes are  
80 unknown, undetected, or unavailable. Moreover, such a strategy could theoretically lead to the  
81 erroneous removal of new cell types or developmental states with intermediate expression  
82 profiles (Fig. 1A). Given these shortcomings, new methods for predicting doublets using gene  
83 expression features alone would greatly benefit the single-cell genomics field.

84 DoubletFinder predicts doublets in a fashion agnostic to nUMIs, marker gene expression,  
85 genetic background or exogenous barcodes and can be split into four distinct steps: (1) Generate  
86 artificial doublets, (2) Merge real and artificial data and reduce dimensionality with principal  
87 component analysis (PCA), (3) Define the nearest neighbors for every real cell in PC space, and  
88 (4) Compute and threshold the proportion of artificial nearest neighbors (pANN; Fig. 1B). We  
89 tested the efficacy of DoubletFinder against scRNA-seq datasets where doublets are empirically-  
90 defined: The publically-available Cell Hashing and Demuxlet datasets comprised of 15,178 and  
91 35,524 peripheral blood mononuclear cells (PBMCs), respectively. Demuxlet PBMCs were  
92 derived from 8 genetically-distinct human sources while Cell Hashing PBMCs were barcoded  
93 with 8 distinct antibody-oligonucleotide conjugate panels. Using optimized input parameters  
94 (Supplementary Materials, Fig. S1), we tested whether pANN outperforms nUMIs as a doublet-  
95 prediction feature by using receiver operating curve (ROC) analysis to compare logistic  
96 regression models trained on the Cell Hashing data using pANN alone, nUMIs alone, or both  
97 (Fig. 1C). ROC analysis demonstrates that pANN predicts doublets more accurately than nUMIs.  
98 Moreover, the model trained with both features performed nearly indistinguishably to the pANN-  
99 alone model, suggesting that DoubletFinder captures all of the doublet-specific information  
100 inherent to nUMIs.

101

102 DoubletFinder predicts Cell Hashing doublets: To make specific doublet predictions for each  
103 cell, DoubletFinder rank-orders cells by their pANN values and thresholds this list according to  
104 the number of expected doublets. To test the robustness of pANN thresholding, the number of  
105 expected doublets was determined using two different strategies (Fig. 1D). First, since 8 samples  
106 were multiplexed in the Cell Hashing and Demuxlet studies, we reasoned that 1/8 of the true  
107 doublets were undetected because they were formed from genetically-identical or identically-  
108 barcoded cells. Thus, we thresholded pANN according to the number of detected doublets with  
109 an assumed 12.5% false negative rate ( $\beta$ ). Second, since the doublet formation rate can be  
110 accurately estimated by applying Poisson statistics to the number of cells loaded into the droplet  
111 microfluidics device (10X Genomics, 2017), we thresholded pANN according to this rate. For  
112 standard scRNA-seq experiments where doublets are not empirically-defined, pANN can only  
113 be thresholded using the Poisson strategy.

114        Depending on the threshold used, DoubletFinder predicted 2680 or 2155 doublets when  
115 applied to the full Cell Hashing dataset. Single-cell gene expression data was visualized using  
116 t-stochastic neighborhood embedding (t-SNE; van der Maaten and Hinton, 2008) and cells were  
117 colored according to their real and predicted doublet status (Fig. 1E). Visual comparison of  
118 doublets in t-SNE space illustrates that DoubletFinder predictions closely track Cell Hashing  
119 results. This result is further supported by the observation that the frequency of DoubletFinder  
120 predictions is highly enriched in Cell Hashing-defined doublet groups relative to singlet groups  
121 (Fig. 1F), regardless of the thresholding strategy used.

122

123 DoubletFinder predicts Cell Hashing false-negatives: DoubletFinder predictions exhibit a less  
124 'speckled' appearance in t-SNE space relative to the Cell Hashing results (Fig. 2A, insets).  
125 Considering that doublets often cluster separately from singlets in gene expression space

126 (Stoeckius et al., 2017; Kang et al., 2018), we reasoned that cells called as singlets via Cell  
127 Hashing, that nonetheless co-cluster with high-confidence doublets, are actually false-negatives  
128 derived from identically-barcoded cells. Two main predictions follow from this line of reasoning.  
129 First, if the putative false negatives are truly doublets, then they should exhibit gene expression  
130 patterns associated with distinct cell types. In line with this prediction, Cell Hashing-defined  
131 doublets and singlets in the highlighted region express marker genes for both B cells and NK  
132 cells (Fig. 2B) – hematopoietic cell types that do not share a common progenitor in peripheral  
133 blood. Second, since false negative cells would be associated with the combined barcodes of  
134 two cells, the nUMI counts for the most abundant barcode should be significantly higher in false  
135 negatives than high-confidence doublets. Moreover, since false negatives would not be  
136 associated with high levels of multiple barcodes, the second most abundant barcode should be  
137 similar to high-confidence singlets and significantly lower relative to high-confidence doublets.  
138 Statistical analysis supports these predictions (Wilcoxon rank sum test,  $p < 10^{-13}$ ; Fig. 2C).  
139 Collectively, these results demonstrate that DoubletFinder robustly recapitulates doublet  
140 assignments and accurately predicts Cell Hashing false-negatives.

141

142 DoubletFinder predicts Demuxlet doublets and identifies putative false-positives: To test whether  
143 DoubletFinder performance is sensitive to changes in the number of sequenced cells and  
144 sequencing depth, we applied DoubletFinder to the Demuxlet dataset. In addition to having more  
145 cells than the Cell Hashing data, the average number of UMIs (2408 vs 676) and genes (837 vs  
146 376) per cell is also greater in the Demuxlet data. In line with our previous results, visual  
147 comparison of real and predicted doublets using t-SNE illustrates that DoubletFinder  
148 successfully identifies all doublet-enriched regions in gene expression space (Fig. 2D).

149 As with our Cell Hashing comparison, there were a number of regions in gene expression  
150 space where DoubletFinder predictions differed from Demuxlet classifications. Specifically, there  
151 were many DoubletFinder-defined doublets called as singlets by Demuxlet that give doublet-  
152 enriched clusters the ‘speckled’ appearance discussed above. Moreover, in contrast to the Cell  
153 Hashing comparison, there was a subset of cells classified as doublets by Demuxlet and singlets  
154 using DoubletFinder (Fig. 2D, insets). Interestingly, the majority of these discordant calls are  
155 scattered amongst high-confidence singlet clusters in gene expression space. This observation  
156 can be explained by two alternative models. In one model, these discordant calls are caused by  
157 homotypic doublets – i.e., doublets formed from cells of the same type – which presumably have  
158 a similar transcriptional profile to singlets and, thus, would be more difficult for DoubletFinder to  
159 detect relative to heterotypic doublets. Alternatively, the discordant calls are due to false-positive  
160 Demuxlet classifications.

161 If these cells were in fact homotypic doublets left undetected by DoubletFinder, then one  
162 would expect that DoubletFinder was insensitive to homotypic doublets throughout the Demuxlet  
163 dataset. To test this possibility, we tracked the cell types comprising each artificial doublet and  
164 deconvolved pANN values into homotypic and heterotypic components. Visualization of cells  
165 with majority homotypic or heterotypic nearest neighbors highlights a region of homotypic  
166 doublets formed from CD4<sup>+</sup> T-cells (Fig. 2E; Supplementary Materials, Fig. S2), which suggests  
167 that DoubletFinder has the sensitivity to detected certain classes of homotypic doublets.  
168 Moreover, the scattering of discordant doublet classifications amongst high-confidence singlet  
169 clusters in gene expression space is also evident in Demuxlet classifications of the Cell Hashing  
170 data (Supplementary Materials, Fig. S2). Cell Hashing is sensitive to homotypic doublets, which  
171 suggests that the discordant calls are not a consequence of homotypic doublets missed by  
172 DoubletFinder. Finally, if the putative false-positive calls are homotypic doublets, one would

173 expect the number of RNA UMIs to approximate levels observed for high-confidence doublets.  
174 Interestingly, the RNA nUMI distribution for putative false-positives is nearly indistinguishable to  
175 high-confidence singlets (Wilcoxon rank sum test,  $p = 0.34$ ), while high-confidence doublets and  
176 putative false-negatives are both significantly enriched for RNA nUMIs (Wilcoxon rank sum test,  
177  $p < 10^{-15}$ ; Fig. 2F). While it is difficult to definitively ascertain the ground truth for these discordant  
178 calls, these results collectively demonstrate that DoubletFinder is robust across a range of cell  
179 numbers and sequencing depths and prospectively predicts Demuxlet false-positives.

180

## 181 **DISCUSSION**

182 High-throughput scRNA-seq suffers from the formation of doublets due to the inherent  
183 nature of Poisson cell loading. Doublets can lead to spurious conclusions during analysis when  
184 left unidentified because the resulting artefactual expression data may be interpreted as  
185 previously-undescribed cell types, developmental intermediates, or disease states. As a result,  
186 it has become common practice to minimize the doublet formation rate by minimizing the ratio  
187 of sequenced cells to mRNA capture beads. Although recent advances in direct doublet  
188 detection methodologies have proven to be effective, they are not universally or retroactively  
189 applicable. For this reason, complementary techniques for predicting doublets based only on  
190 gene expression data have the potential to further increase scRNA-seq throughput while  
191 removing technical artifacts.

192 Towards this goal, DoubletFinder accurately identifies doublets in scRNA-seq data by  
193 integrating artificial doublets into real data and computing the pANN for every real cell. We have  
194 shown that DoubletFinder distinguishes real doublets from singlets better than nUMIs in the Cell  
195 Hashing dataset. Moreover, we demonstrate that DoubletFinder accurately predicts doublets for  
196 two independent PBMC scRNA-seq datasets of different sizes and sequencing depths. As these



197 are the only publically available data with empirically-defined doublets, it is unclear whether  
198 DoubletFinder will require further optimization for scRNA-seq datasets describing different  
199 tissues or biological systems. We have also shown that DoubletFinder identifies false-negative  
200 and putative false-positive doublet classifications present in these datasets, which supports the  
201 use of DoubletFinder in concert with Cell Hashing, Demuxlet, and other barcoding approaches.  
202 Finally, we demonstrate that DoubletFinder performs robustly with pANN thresholding strategies  
203 that differed by >5000 cells (Fig. 1D). This suggests that DoubletFinder can be applied in  
204 experimental contexts where doublet formation rates differ significantly from industry estimates  
205 – e.g., clumpy single-cell suspensions or especially cohesive cell types. Collectively,  
206 DoubletFinder represents a fast, easy-to-use doublet detection strategy that will aid the single-  
207 cell genomics community in data analysis and enable high-throughput scRNA-seq technologies  
208 to be utilized to their fullest potential.

209

## 210 **MATERIALS & METHODS**

211 DoubletFinder Overview: Artificial doublets were generated from raw UMI count matrices via  
212 random sampling of cell expression profiles without replacement before pre-processing using  
213 the ‘Seurat’ R package, as described previously (Butler et al., 2018). Notably, no sources of  
214 variation were regressed out of the merged data before PCA, and the top 10 PCs – chosen via  
215 inflection point estimation on the corresponding elbow plot – were used to define the Euclidean  
216 distance matrix using the ‘dist’ R function.

217

218 ROC Analysis: ROC analysis-based model comparisons were performed using the ‘ROCR’  
219 (Sing et al., 2005) and ‘pROC’ (Robin et al., 2011) R packages. Briefly, logistic regression  
220 models were defined on a training set comprising half the total data using the ‘glm’ R function

221 with the link argument set to 'logit'. These models were then used to create a vector describing  
222 each cell's doublet probability with the 'predict' R function. ROC analysis was then performed by  
223 calculating the sensitivity and specificity of doublet predictions based on the aforementioned  
224 probability vector at varying probability thresholds. The AUC was then calculated for the resulting  
225 curve, and AUC was used as a proxy for doublet detection model performance.

226

227 Statistical Analysis: Statistically-significant differences between UMI levels were defined using  
228 the Wilcoxon rank sum test implemented with the 'pairwisewilcox.test' R function. Multiple  
229 comparison correction was performed using the Benjamini-Hochberg procedure.

230

231 Data Availability: Cell Hashing (GEO: [GSE108313](https://www.ncbi.nlm.nih.gov/geo/query/acc.cgi?acc=GSE108313)) and Demuxlet (GEO: [GSE96583](https://www.ncbi.nlm.nih.gov/geo/query/acc.cgi?acc=GSE96583)) UMI count  
232 matrices were downloaded from the Gene Expression Omnibus. DoubletFinder is implemented  
233 as a fast, easy-to-use R package that interfaces with Seurat version 2.0 and higher.  
234 DoubletFinder can be downloaded from GitHub ([github.com/chris-mcginnis-ucsf/DoubletFinder](https://github.com/chris-mcginnis-ucsf/DoubletFinder)).

235

## 236 **ACKNOWLEDGMENTS**

237 We thank Matt Thomson (California Institute of Technology) for helpful discussion, as well as  
238 Jimmie Ye (UCSF), Marlon Stoeckius and Shiwei Zheng (New York Genome Center) for  
239 providing data access.

240

## 241 **AUTHOR CONTRIBUTIONS**

242 C.S.M., L.M.M., and Z.J.G conceptualized the method and wrote the manuscript. C.S.M. wrote  
243 the software and performed all bioinformatics analyses.

244

## 245 **DECLARATION OF INTERESTS**

246 The authors declare no conflict of interest.

247

## 248 **FUNDING**

249 This research was supported in part by grants from the Department of Defense Breast Cancer  
250 Research Program (W81XWH-10-1-1023 and W81XWH-13-1-0221), the NIH Common Fund  
251 (DP2 HD080351-01), the NSF (MCB-1330864), and the UCSF Center for Cellular Construction  
252 (DBI-1548297), an NSF Science and Technology Center. Z.J.G is a Chan-Zuckerberg Biohub  
253 Investigator. L.M.M is a Damon Runyon Fellow supported by the Damon Runyon Cancer  
254 Research Foundation (DRG-2239-15).

255

## 256 **REFERENCES**

257

- 258 1. The HCA Consortium. The Human Cell Atlas White Paper. 2017. Retrieved from:  
259 [humancellatlas.org/files/HCA\\_WhitePaper\\_18Oct2017.pdf](http://humancellatlas.org/files/HCA_WhitePaper_18Oct2017.pdf)
- 260 2. Stegle O, Teichmann SA, Marioni JC. Computational and analytical challenges in single-  
261 cell transcriptomics. *Nat Rev Genet.* 2015; 16(3):133-45.
- 262 3. Macosko EZ, Basu A, Satija R, Nemesh J, Shekhar K, Goldman M, et al. Highly Parallel  
263 Genome-wide Expression Profiling of Individual Cells Using Nanoliter Droplets. 2015.  
264 *Cell*; 161(5):1202-1214.
- 265 4. Klein AM, Mazutis L, Akartuna I, Tallapragada N, Veres A, Li V, et al. Droplet barcoding  
266 for single-cell transcriptomics applied to embryonic stem cells. 2015. *Cell*; 161(5):1187-  
267 1201.
- 268 5. Zheng GX, Terry JM, Belgrader P, Ryvkin P, Bent ZW, Wilson R, et al. Massively parallel  
269 digital transcriptional profiling of single cells. *Nat Commun.* 2017; 8:14049.
- 270 6. Gierahn TM, Wadsworth MH 2nd, Hughes TK, Bryson BD, Butler A, Satija R, *et al.* Seq-  
271 Well: portable, low-cost RNA sequencing of single cells at high throughput. *Nat Methods.*  
272 2017; 14(4):395-398.
- 273 7. Takara Bio USA. Full-length, single-cell RNA-seq with the SMARTer™ ICELL8® Single-  
274 Cell System (Application note 633878). Mountain View, CA: Takara Bio. 2018. Available  
275 from:  
276 [clontech.com/US/Products/cDNA\\_Synthesis\\_and\\_Library\\_Construction/NGS\\_Automati](http://clontech.com/US/Products/cDNA_Synthesis_and_Library_Construction/NGS_Automation/Single-Cell_Automation/Single-Cell_Automation_Overview?sitex=10020:22372:US)  
277 [on/Single-Cell\\_Automation/Single-Cell\\_Automation\\_Overview?sitex=10020:22372:US](http://clontech.com/US/Products/cDNA_Synthesis_and_Library_Construction/NGS_Automation/Single-Cell_Automation/Single-Cell_Automation_Overview?sitex=10020:22372:US)
- 278 8. 10X Genomics. Chromium™ Single Cell 3' Reagent Kits v2 User Guide. Pleasanton,  
279 CA: 10X Genomics. 2017.

- 280 9. Ilicic T, Kim JK, Kolodziejczyk AA, Bagger FO, McCarthy DJ, Marioni JC, Teichmann SA.  
281 Classification of low quality cells from single-cell RNA-seq data. *Genome Biol.* 2016  
282 17:29.
- 283 10. Stoeckius M, Zheng S, Houck-Loomis B, Hao S, Yeung BZ, Smibert P, Satija R. Cell  
284 "hashing" with barcoded antibodies enables multiplexing and doublet detection for single  
285 cell genomics. 2017. Preprint. bioRxiv doi: 10.1101/237693.
- 286 11. Kang HM, Subramaniam M, Targ S, Nguyen M, Maliskova L, McCarthy E. Multiplexed  
287 droplet single-cell RNA-sequencing using natural genetic variation. *Nat Biotechnol.* 2018;  
288 36(1):89-94.
- 289 12. Gehring J, Park JH, Chen S, Thomson M, Pachter L. Highly Multiplexed Single-Cell RNA-  
290 seq for Defining Cell Population and Transcriptional Spaces. 2018. Preprint: bioRxiv doi:  
291 10.1101/315333.
- 292 13. Guo C, Bidy BA, Kamimoto K, Kong W, Morris SA. CellTag Indexing: a genetic barcode-  
293 based multiplexing tool for single- cell technologies. 2018. Preprint: bioRxiv doi:  
294 10.1101/335547.
- 295 14. Rosenberg AB, Roco CM, Muscat RA, Kuchina A, Sample P, Yao Z, et al. Single-cell  
296 profiling of the developing mouse brain and spinal cord with split-pool barcoding. *Science.*  
297 2018; 360(6385):176-182.
- 298 15. Islam S, Zeisel A, Joost S, La Manno G, Zajac P, Kasper M, Lönnerberg P, Linnarsson  
299 S. Quantitative single-cell RNA-seq with unique molecular identifiers. *Nat Methods.* 2014;  
300 11(2):163-6.
- 301 16. Ziegenhain C, Vieth B, Parekh S, Reinius B, Guillaumet-Adkins A, Smets M, et al.  
302 Comparative Analysis of Single-Cell RNA Sequencing Methods. *Mol Cell.* 2017.  
303 65(4):631-643.e4.
- 304 17. Butler A, Hoffman P, Smibert P, Papalexi E, Satija R. Integrating single-cell transcriptomic  
305 data across different conditions, technologies, and species. *Nat Biotechnol.* 2018; doi:  
306 10.1038/nbt.4096.
- 307 18. van der Maaten L, Hinton G. Visualizing Data using t-SNE. *J. Mach. Learn. Res.* 2008; 9:  
308 2579–2605.
- 309 19. Sing T, Sander O, Beerenwinkel N, Lengauer T. ROCr: visualizing classifier performance  
310 in R. *Bioinformatics.* 2005; 21(20): 3940-1.
- 311 20. Robin X, Turck N, Hainard A, Tiberti N, Lisacek F, Sanchez JC, Müller M. pROC: an open-  
312 source package for R and S+ to analyze and compare ROC curves. *BMC Bioinformatics,*  
313 2011; 12: 77.

314  
315  
316  
317  
318  
319  
320  
321  
322  
323  
324  
325  
326

327  
328  
329  
330  
331

## FIGURE LEGENDS

332 **Figure 1: DoubletFinder robustly predicts Cell Hashing doublets and outperforms nUMI**  
333 **thresholding.** (A) Schematic describing importance of doublet detection. Developmental  
334 intermediates (light red) can express genes associated with both progenitor (grey) and  
335 differentiated (dark red) cell types. Doublets formed from progenitor and mature cells may mimic  
336 the expression profile of intermediate cell states, and thereby confound analysis. (B) Schematic  
337 of DoubletFinder workflow. After artificial doublet (red outline) generation, the proportion of  
338 artificial nearest neighbors is defined for every real cell (examples highlighted yellow). These  
339 results are thresholded to define doublet predictions. (C) Density plot of pANN values with red  
340 dotted lines denoting expected doublet thresholds. Histogram is colored according to whether  
341 the cells were called as singlets (grey) or doublets by one (light red) or both thresholding  
342 strategies (dark red). (D) t-SNE visualization of real and predicted Cell Hashing doublets (red)  
343 and singlets (grey), DoubletFinder predictions, and nUMI thresholding predictions. nUMI  
344 predictions deviate significantly from Cell Hashing results (red dashed boxes). (E) Heat map  
345 showing the proportion of DoubletFinder and nUMI-predicted doublets present in Cell Hashing  
346 singlet (S) and doublet (D) groups. (F) ROC analysis of logistic regression models trained using  
347 nUMIs alone (dotted red), pANN alone (solid blue) and both nUMIs and pANN (dashed orange)  
348 as features.

349 **Figure 2: DoubletFinder detects false-negative and false-positive doublet predictions in**  
350 **Cell Hashing and Demuxlet datasets.** (A) t-SNE visualization of real and predicted Cell  
351 Hashing doublets (red) and singlets (grey) highlighting a doublet-enriched, 'speckled' region.  
352 (B) Violin plots describing the distribution of marker gene expression in high-confidence doublets  
353 (red), putative false-negatives (blue), and singlet B-cells (teal) and NK cells (orange). (C)  
354 Barcode UMI box plots for the 1<sup>st</sup> and 2<sup>nd</sup> most abundant barcodes in high-confidence singlets  
355 (black) and doublets (red), as well as false-negative singlets (blue). (D) t-SNE visualization of  
356 real and predicted Demuxlet doublets (red) and singlets (grey) highlighting putative false-  
357 positives. (E) Violin plots describing the contributions of homotypic and heterotypic doublets to  
358 each DoubletFinder-defined doublet's nearest neighborhood. t-SNE visualization of putative  
359 homotypic and heterotypic doublet clusters in gene expression space. (F) RNA UMI box plots  
360 for high- confidence singlets (black) and doublets (red) as well as discordant doublet predictions  
361 between Demuxlet and DoubletFinder (orange).
